# Supplementary material for: Composition of Culturable Microorganisms in Dusts Collected from Sport Facilities in Finland during the COVID-19 Pandemic
Source: MDPI journal article supplement (doi:10.3390/pathogens12020339), 2023-02-16
Supplement: s1 [file s1]

**Table S1.** Morphology of major genera of fungal strains isolated from settled indoor dusts collected in sport facilities in Finland. Pathogenic potential was estimated based on the ability to grow at 37°C on Tryptic Soy Agar (TSA), pH 7.2, compared to growth on Malt Extract Agar (MEA), pH 5.5. The strains represent 67% of the total number of colonies.

[illegible]

|                     |    |                            |     |   |      |                                                                                      |                                                                                      |
|---------------------|----|----------------------------|-----|---|------|--------------------------------------------------------------------------------------|--------------------------------------------------------------------------------------|
| <i>Chaetomium</i>   | 2  | SF1                        | -   | - | 9–10 |   |   |
| <i>Paecilomyces</i> |    |                            |     |   |      |                                                                                      |                                                                                      |
| <i>Paecilomyces</i> | 8  | SF3a<br>SF3b<br>SF6<br>SF7 | (+) | + | 5–6  |   |   |
| <i>Penicillium</i>  |    |                            |     |   |      |                                                                                      |                                                                                      |
| <i>Penicillium</i>  | 5  | SF5<br>SF1<br>RD1<br>RD2   | -   | - | 3–4  |   |   |
| <i>Penicillium</i>  | 10 | RD1<br>RD2                 | -   | - | 2–3  |   |   |
| <i>Yeast</i>        |    |                            |     |   |      |                                                                                      |                                                                                      |
| <i>Yeast</i>        | 4  | SF2b                       | +   | + |      |  |  |

\* += Growth on TSA and MEA similar, i.e. colonies of same size on TSA and MEA, (+) growth weaker on TSA than MEA. – No visible growth on TSA detected.
